# Supplementary material
Source: Springer Nature journal article supplement (https://www.springermedizin.de/resource/supplementary/12936_2011_1848_MOESM1_ESM.pdf/9541916)
Supplement: MOESM1 [file 9541916]

10 20 30 40 50 60  
MWIVKFLIVVHFFIICTINFDKLYISYSYNIVPENGRMLNMRILGEEKPNVDGVSTSNTP

MSP4A DKLYISYSYNIVPENGRMLNMRILGEEKPNVDGVSTSNTP  
MSP4.1 DKLYISYSYNIVPENGRMLN  
MSP4.2 IVPENGRMLNMRILGEEKPN (Mab H12)  
MSP4.3 MRILGEEKPNVDGVSTSNTP  
MSP4.4 VDGVSTSNTP

70 80 90 100 110 120  
GGNESSASP NLS DAAEKKDEKEASEQGEESHKKENSQESANGKDDVKEEKKTNEKKDDG

MSP4A GGNESSASP NLS DAAEKKDEKE  
MSP4B ASEQGEESHKKENSQESANGKDDVKEEKKTNEKKDDG  
MSP4.4 GGNESSASP  
MSP4.5 GGNESSASP NLS DAAEKKD  
MSP4.6 NLS DAAEKKDEKEASEQEE  
MSP4.7 EKEASEQGEESHKKENSQES  
MSP4.8 SHKKENSQESANGKDDVKEE  
MSP4.9 ANGKDDVKEEKKTNEKKDDG  
MSP4.10 KKTNEKKDDG

130 140 150 160 170 180  
KTDKQVEKVLKESPKESQMVDKDKKTEAIPKKVVQPSSSNSGGHVGEEDHNEGEHEE

MSP4B KTDKQVEKVLKESPKESQMVDKDKKTE  
MSP4C AIPKKVVQPSSSNSGGHVGEEDHNEGEHEE  
MSP4.10 KTDKQVEKVL  
MSP4.11 KTDKQVEKVLKESPKESQMV  
MSP4.12 EKSPKESQMVDKDKKTEAIP  
MSP4.13 DDKKTEAIPKKVVQPSSSN (Mab 6G10)  
MSP4.14 KKVQPSSSNSGGHVGEED  
MSP4.15 SGGHVGEEDHNEGEHEE  
MSP4.16 HNEGEHEE

190 200 210 220 230 240  
EEEHEEDDDDEDDDTYNKDDLEDEDLCKHNNGCGDDKLCYVGNRRVKCKCKEGYKLEG

MSP4C EEEHEEDDDDEDDDTYNKDDLEDED  
MSP4D LCKHNNGCGDDKLCYVGNRRVKCKCKEGYKLEG  
MSP4.16 EEEHEEDDDD  
MSP4.17 EEEHEEDDDDEDDDTYNKDD  
MSP4.18 EDDDTYNKDDLEDEDLCKHN  
MSP4.19 LEDEDLCKHNNGCGDDKLC  
MSP4.20 NGGCGDDKLCYVGNRRVKC  
MSP4.21 (Mabs 4C10, 1G10, 1H2, 6G11) EYVGNRRVKCKCKEGYKLEG  
MSP4.22 CKCKEGYKLEG

250 260 270  
IECVELLSLASSSLNLI FNSFITIFVVILLIN

MSP4.22 IECVELLSLASSS  
MSP4.23 IECVELLSLASSS
